# Supplementary material for: The conserved 3′X terminal domain of hepatitis C virus genomic RNA forms a two-stem structure that promotes viral RNA dimerization
Source: PubMed Central journal article supplement — Nucleic Acids Res. 2015 Aug 3;43(17):8529–39. doi: 10.1093/nar/gkv786 (PMC4787799; doi:10.1093/nar/gkv786), 2015-08-03
Supplement: supp_gkv786_Gallego_SM300715FINAL.pdf [file supp_gkv786_Gallego_SM300715FINAL.pdf]

# The conserved 3'X terminal domain of hepatitis C virus genomic RNA forms a two-stem structure that promotes viral RNA dimerization

Ángel Cantero-Camacho and José Gallego\*

## SUPPLEMENTARY FIGURE LEGENDS AND SUPPLEMENTARY FIGURES

Figure S1. RNA sequences studied by NMR spectroscopy and gel electrophoresis experiments. The self-complementary DLS nucleotides are highlighted in red.

Figure S2. Impact of  $Mg^{2+}$  ions on the conformation of 3'X domain sequences analysed by native gel electrophoresis experiments. (A) Constructs SL2', SL2+3 and X98 (full-length 3'X domain); (B) constructs SL1, SL2 and SL3. Experiments (A) and (B) compare the mobility of 3'X domain sequences previously folded in the absence or presence of 1mM  $MgCl_2$ , relative to a tRNA control. Both experiments used a running buffer containing  $Mg^{2+}$  ions. Conditions: 20  $\mu$ M RNA, TBM running buffer (1 mM  $MgCl_2$ ).

Figure S3. NOESY analysis of subdomain SL1. The image shows the assignment of the imino-aromatic (top) and imino-imino (bottom) regions of a watergate-NOESY spectrum acquired at 16 °C with 150 ms mixing time. Sequential crosspeaks between G and U imino protons are indicated with solid lines, sequential contacts between A H2 and G H1 protons are marked with dashed lines, and NOE interactions across base pairs are labelled with colons. Assignments of C amino protons have been omitted for clarity, and crosspeaks marked with asterisks are visible at a lower contour level. Conditions: 240  $\mu$ M SL1, 0 mM NaCl/ $MgCl_2$ .

Figure S4. NOESY analysis of subdomain SL2'. The image shows the assignment of the imino-aromatic (top) and imino-imino (bottom) regions of a watergate-NOESY spectrum acquired at 16 °C with 150 ms mixing time. Sequential crosspeaks between G and U imino protons are indicated with solid lines, sequential contacts between A H2 and G H1 protons are marked with dashed lines, and NOE interactions across base pairs are labelled with colons. Assignments of C amino protons have been omitted for clarity. Conditions: 240  $\mu$ M SL2', 0 mM NaCl/ $MgCl_2$ .

Figure S5. NMR spectroscopy analysis of construct SL2+3. (A)  $^1H$ - $^{15}N$  HSQC spectrum of SL2+3 at low ionic strength (black), superposed with that of construct SL2' (red) acquired under the same temperature and ionic conditions. The assignments of SL2' crosspeaks are in red (orange for DLS nucleotides), and tentative SL2+3 assignments are indicated in black and between parentheses. Red arrows mark SL2' crosspeaks of

common nucleotides that are clearly not present in the SL2+3 spectrum (specifically U7 and G48), and black arrows mark SL2+3 crosspeaks that are clearly not matched in the SL2' spectrum. Conditions: 44  $\mu$ M SL2+3, 0 mM NaCl/MgCl<sub>2</sub>, 27 °C. (B) Superposition of exchangeable <sup>1</sup>H spectra of constructs SL2, SL3 and SL2+3 acquired at low ionic strength. Conditions: 73, 105 and 224  $\mu$ M SL2, SL3 and SL2+3, respectively, 0 mM NaCl/MgCl<sub>2</sub>, 27 °C. (C) <sup>1</sup>H-<sup>15</sup>N HSQC spectrum of SL2+3 acquired in the presence of 100 mM NaCl (green), superposed with that of SL2' (red) acquired under the same temperature and ionic conditions. The assignments of SL2' crosspeaks are marked in red (orange for DLS nucleotides), and tentative SL2+3 assignments are indicated in green. Additional, weak SL2+3 crosspeaks that appeared at higher ionic strength and clearly matched SL2' DLS signals (U30, U34 and U36) are indicated with green circles. Conditions: 44  $\mu$ M SL2+3, 100 mM NaCl, 27 °C. (D) Superposition of the exchangeable <sup>1</sup>H spectra of construct SL2 in the absence and presence of 100 mM NaCl. Notice the stabilization of imino resonances at higher ionic strength. Conditions: 73  $\mu$ M SL2, 27 °C. (E) Models of SL2+3 monomeric and dimeric structures.

Figure S6. Impact of NaCl on the structure of the full-length 3'X domain analysed by NMR spectroscopy. (A) Superposition of <sup>1</sup>H-<sup>15</sup>N HSQC spectra of construct X98 acquired in the absence (green) and presence (red) of 100 mM NaCl. Conditions: 34  $\mu$ M X98, 27 °C. The assignments are based on comparisons with HSQC data of constructs SL1 and SL2' acquired under the same temperature and ionic conditions, and appear in blue and red for crosspeaks of subdomains SL1' and SL2', respectively. The two crosspeaks detected at 100 mM NaCl but absent at lower ionic strength are labelled in parentheses. (B) Model of a full-length 3'X dimer consistent with the NMR data. The NMR signals of each of the two symmetrical halves of the dimer (separated by a dashed line) are equivalent.

Figure S7. Impact of Mg<sup>2+</sup> on the structure of constructs SL2' and X98 (full-length domain) analysed by NMR spectroscopy. (A) Superposition of <sup>1</sup>H-<sup>15</sup>N HSQC spectra of SL2' acquired in the absence (green) and presence (blue) of 2 mM MgCl<sub>2</sub>. Conditions: 61 (green) and 49 (blue)  $\mu$ M SL2', 27 °C. (B) <sup>1</sup>H-<sup>15</sup>N HSQC spectrum of X98 acquired in the presence of 2 mM MgCl<sub>2</sub> (green), superposed with those of SL1 (blue) and SL2' (red) obtained under the same temperature and ionic conditions. The assignments appear in blue and red for crosspeaks of nucleotides belonging to subdomains SL1' and SL2', respectively. The SL1 G53, U55, G97 and G98 HN crosspeaks that do not match X98 signals are marked with black assignments. Conditions: 34  $\mu$ M X98, 2 mM MgCl<sub>2</sub>, 27 °C. To favour monomeric species, all samples were snap-cooled in the absence of NaCl or MgCl<sub>2</sub>, and then incubated with 2 mM MgCl<sub>2</sub> for 150 minutes at 25 °C. In (A) and (B), additional crosspeaks that appeared with Mg<sup>2+</sup> and were not visible at low ionic strength or with 100 mM NaCl are marked with asterisks.

**X98** 5' GGUGGCUCCA UCUUAGCCCU AGUCACGGCU  
AGCUGUGAAA GGUCCGUGAG CCGCUUGACU  
GCAGAGAGUG CUGAUACUGG CCUCUCUGCA  
GAUCAAGU 3'

**SL1** 5' GCUUGACUGC AGAGAGUGCU GAUACUGGCC  
UCUCUGCAGA UCAAGU 3'

**SL2+3** 5' GGUGGCUCCA UCUUAGCCCU AGUCACGGCU  
AGCUGUGAAA GGUCCGUGA 3'

**SL2'** 5' GGUGGCUCCA UCUUAGCCCU AGUCACGGCU  
AGCUGUGAAA GGUCCGUGAG CCGCU 3'

**SL2** 5' GUCACGGCUA GCUGUGAAAG GUCCGUGAG

**SL3** 5' UGGUGGCUCC AUCUUAGCCC UA

**cre26** 5' GGAGACAUAU AUCACAGCCU GUCUCC

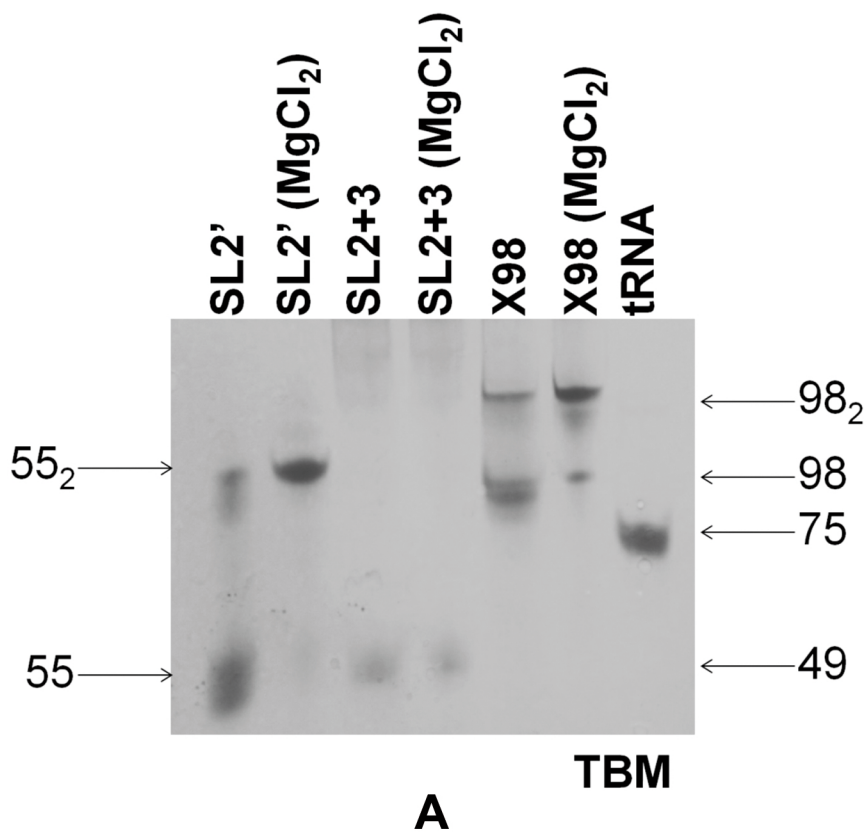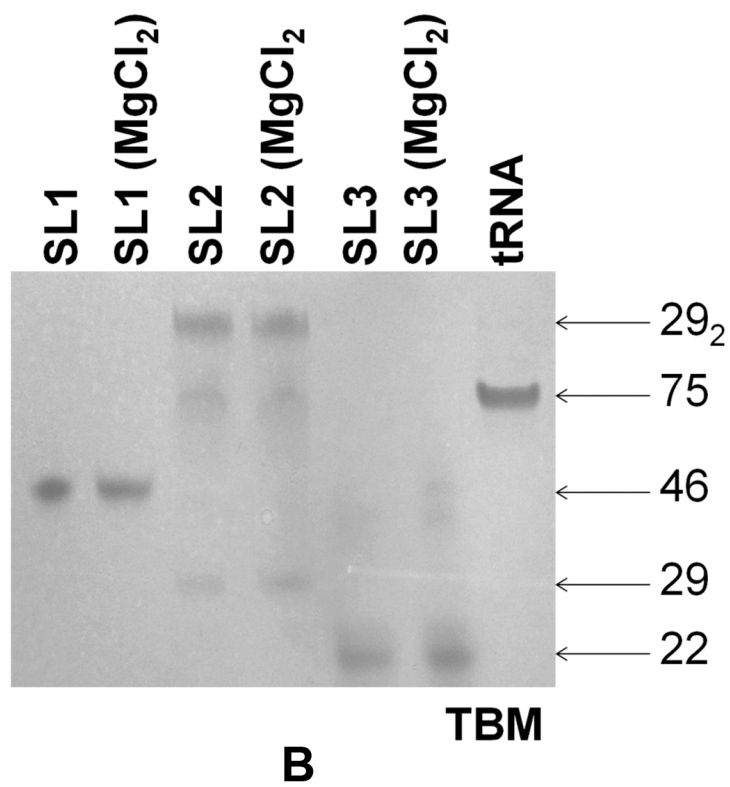

Fig. S2



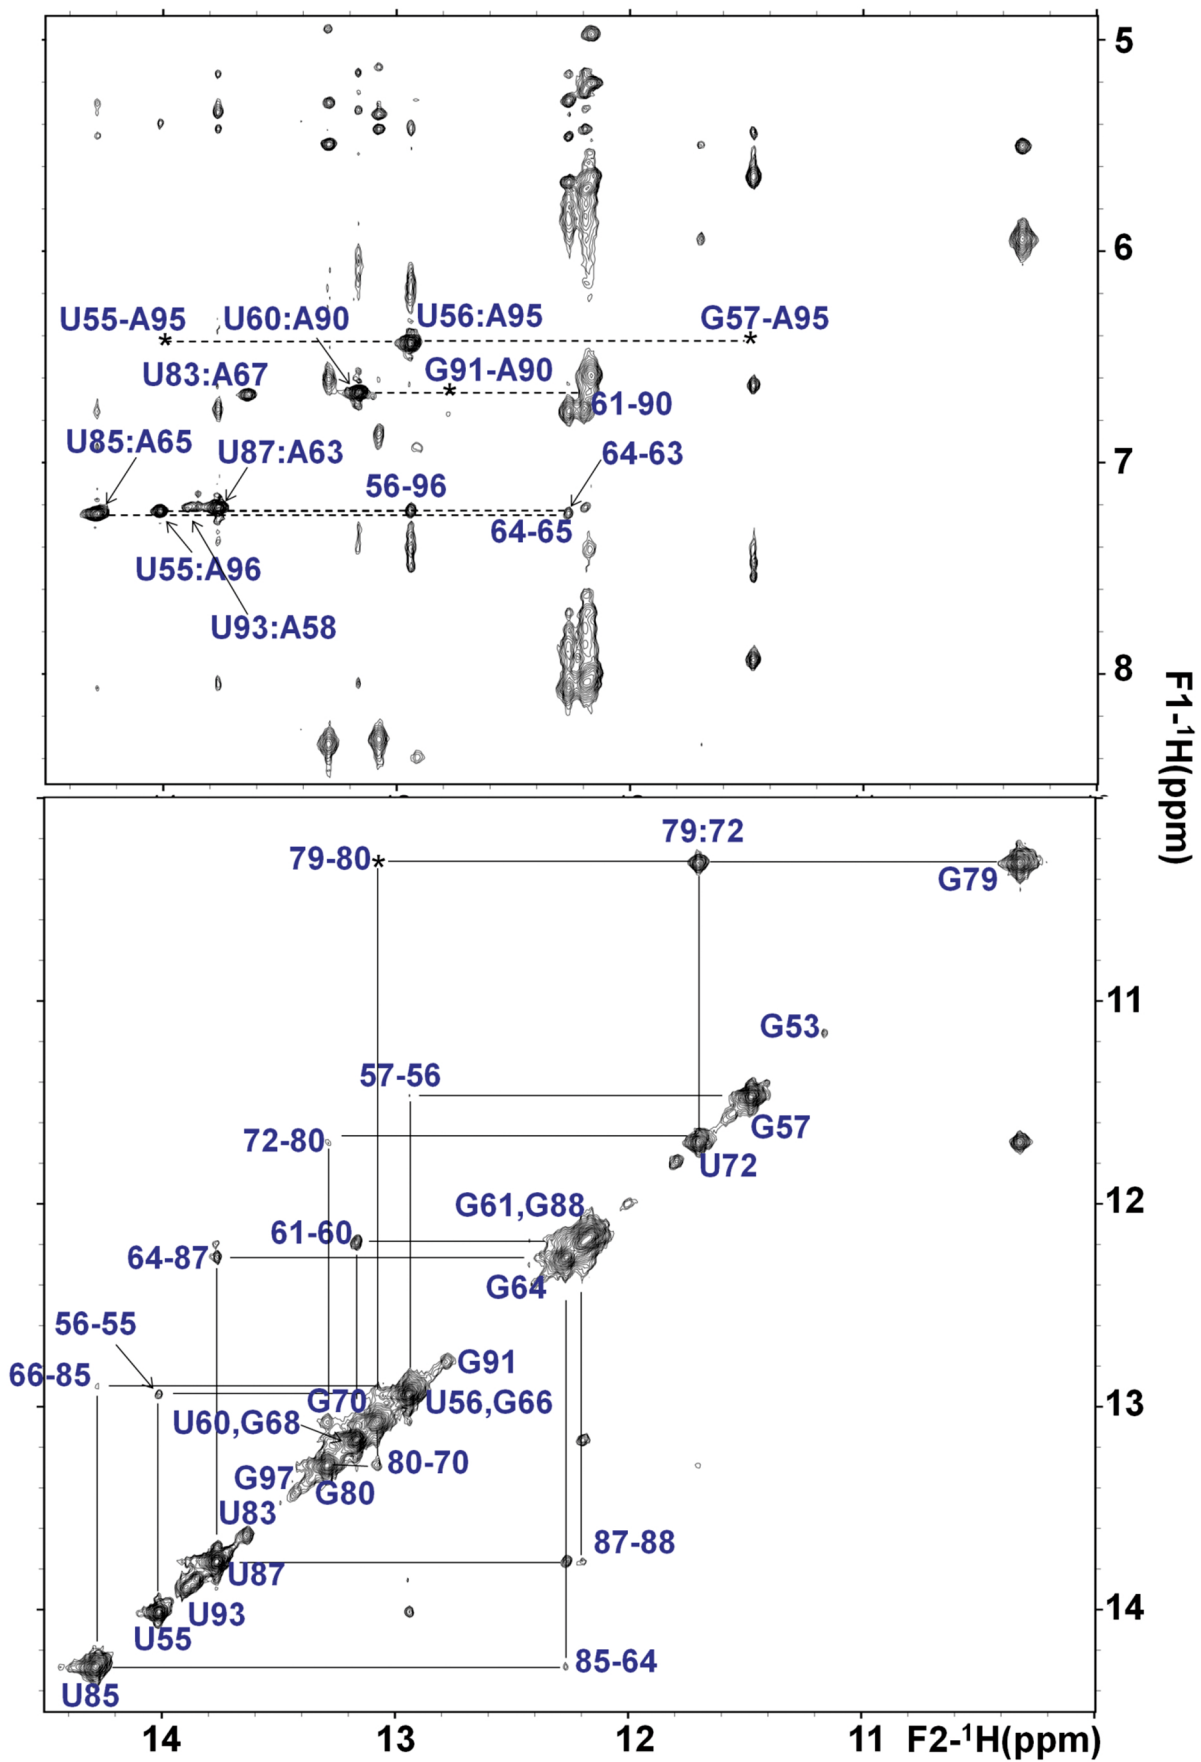

Fig. S3

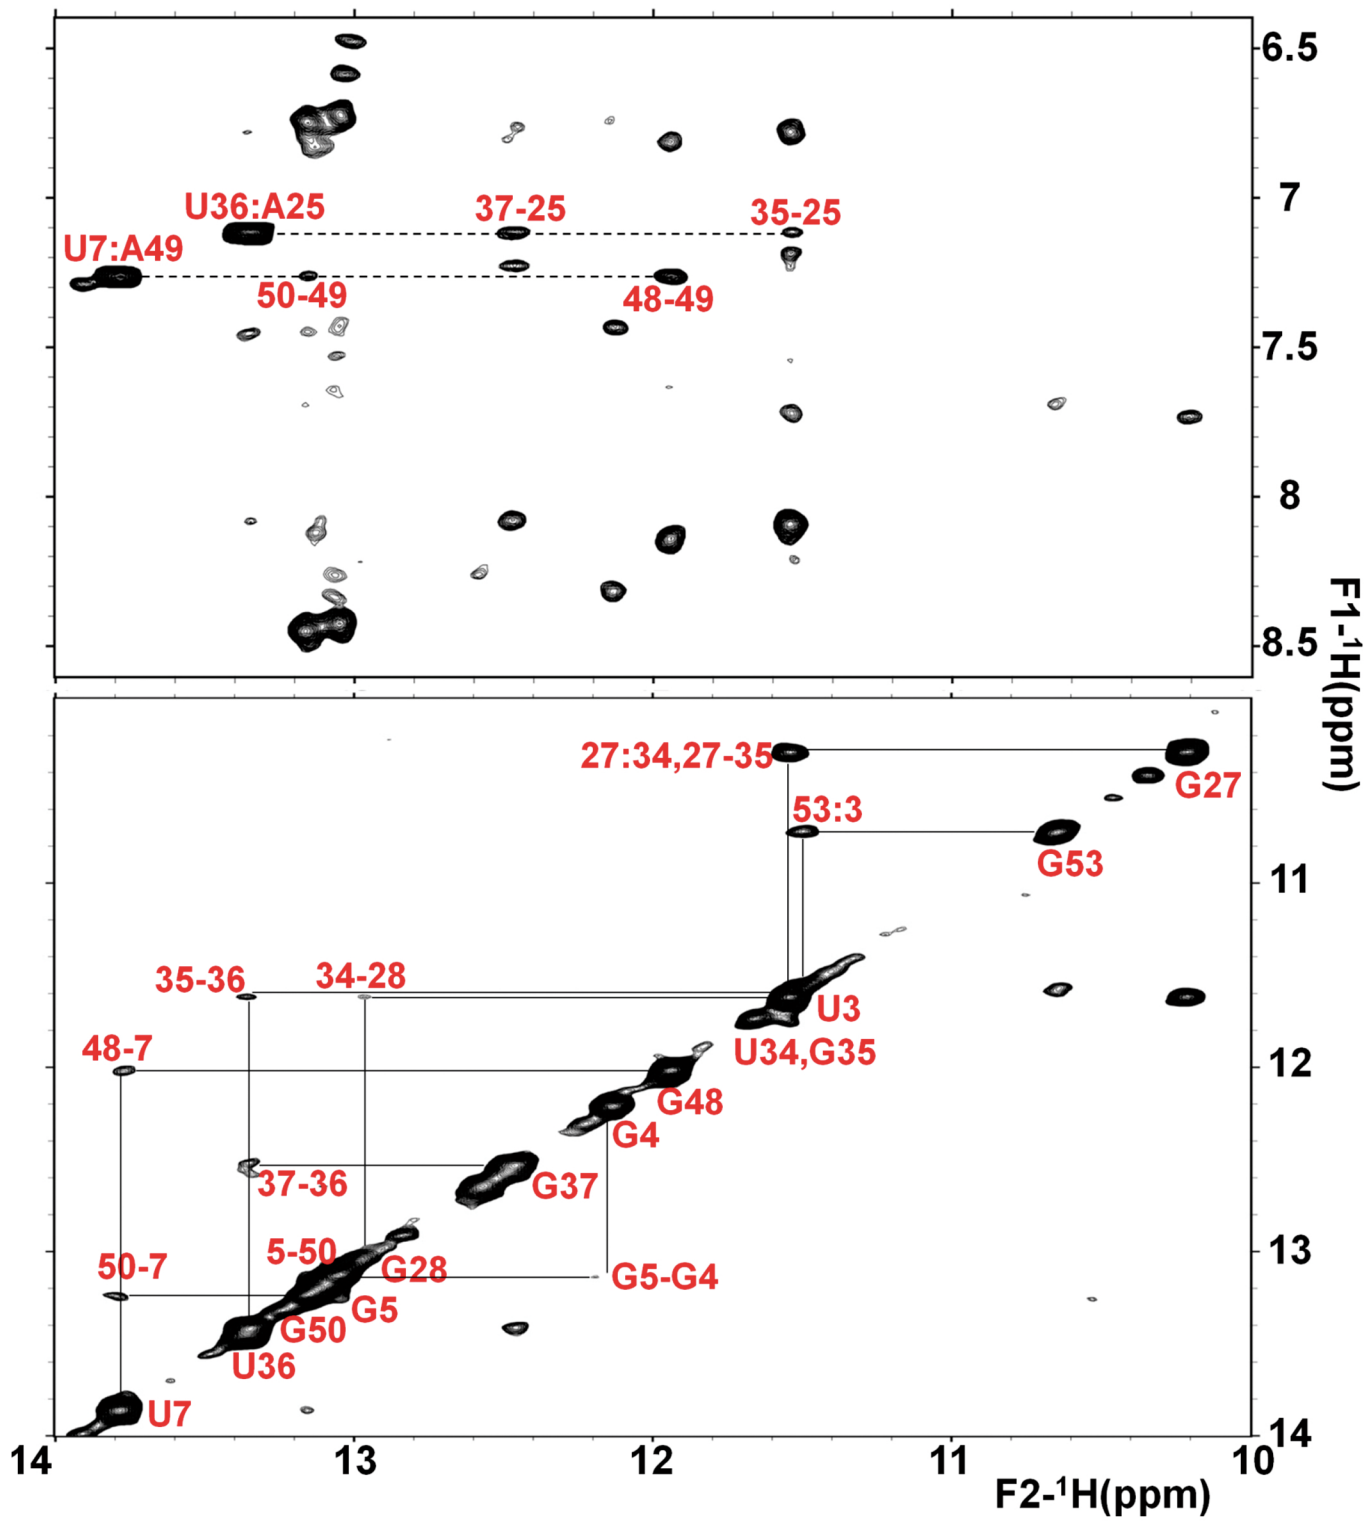

Fig. S4

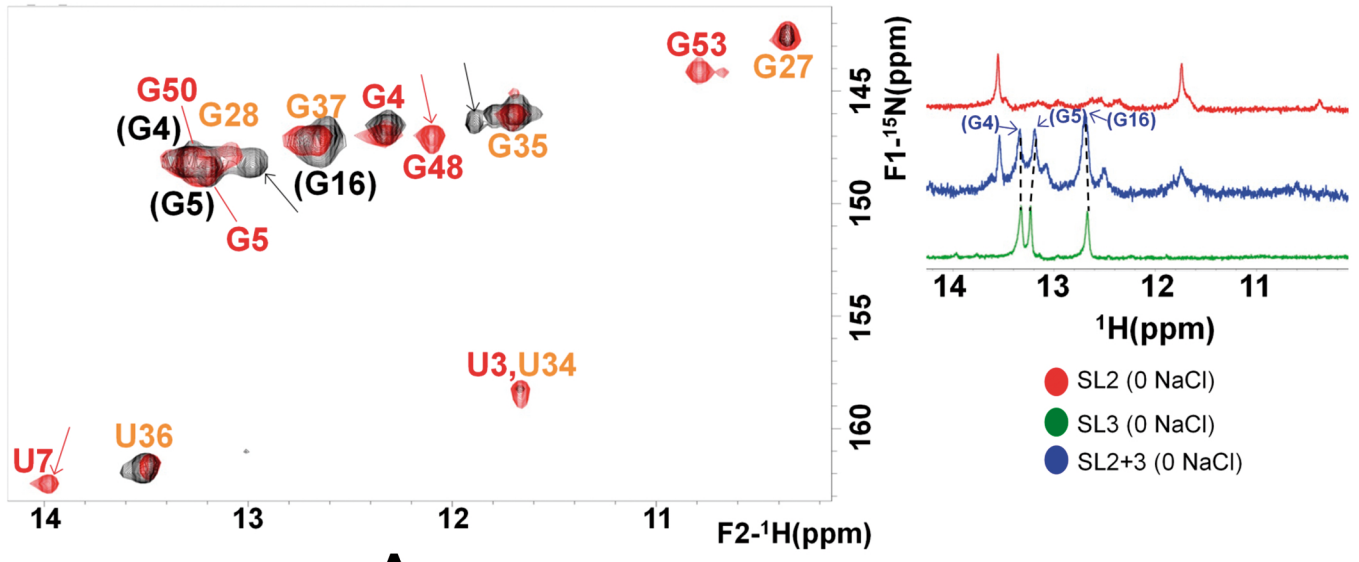

**A**

**B**

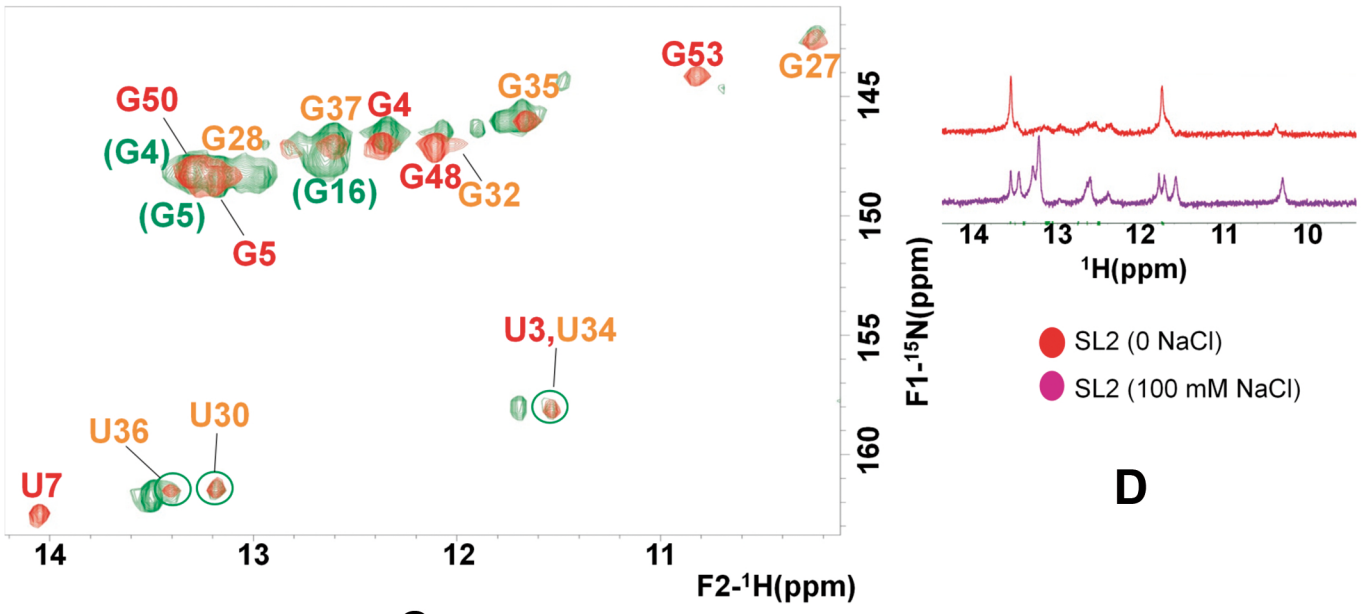

**C**

**D**

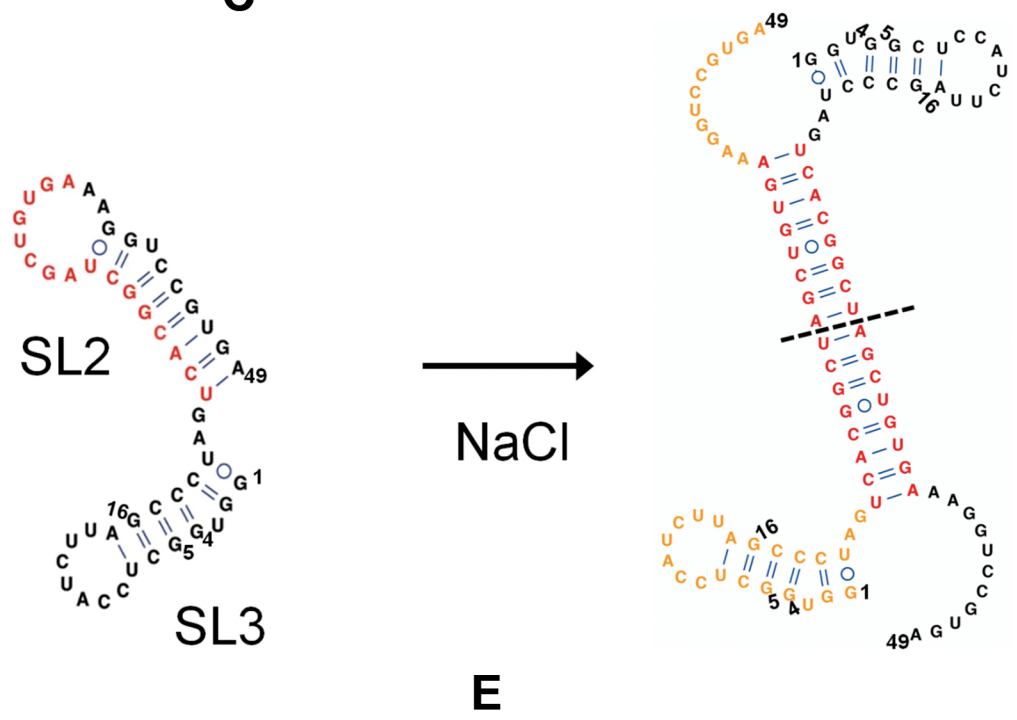

**E**

Fig. S5

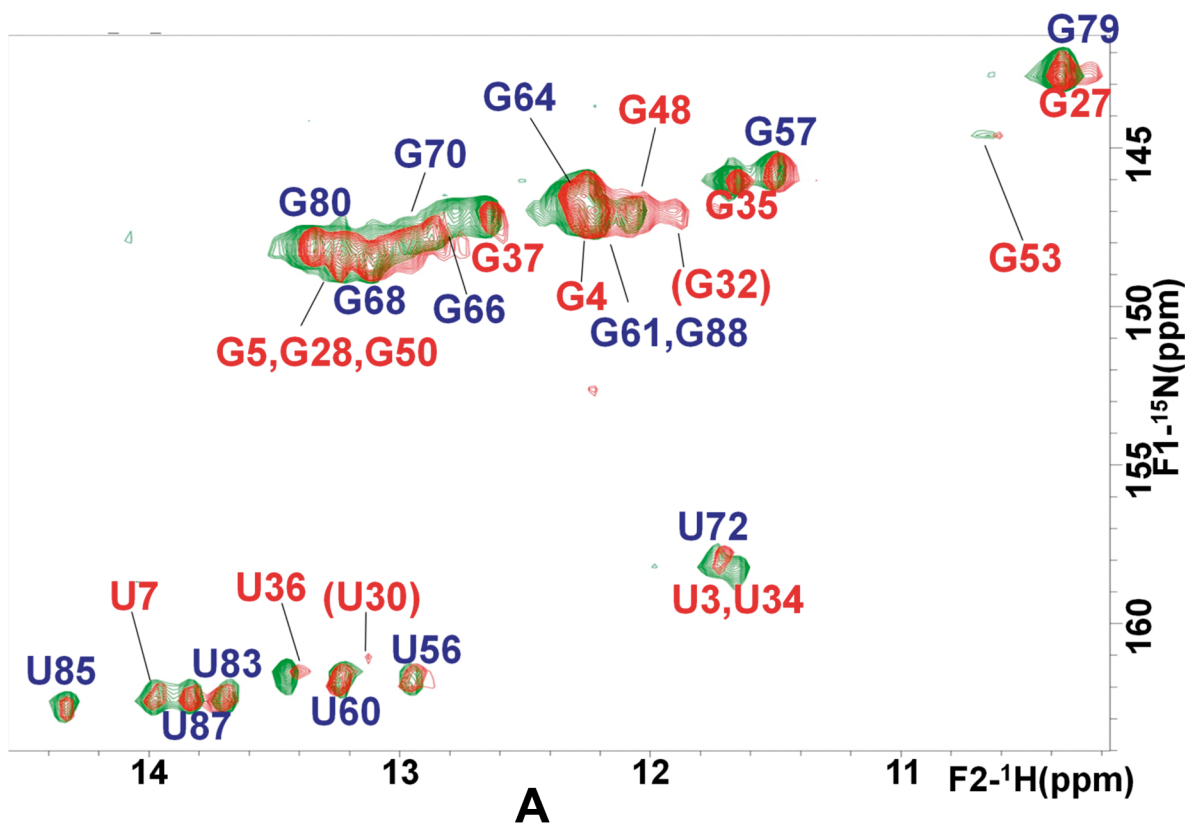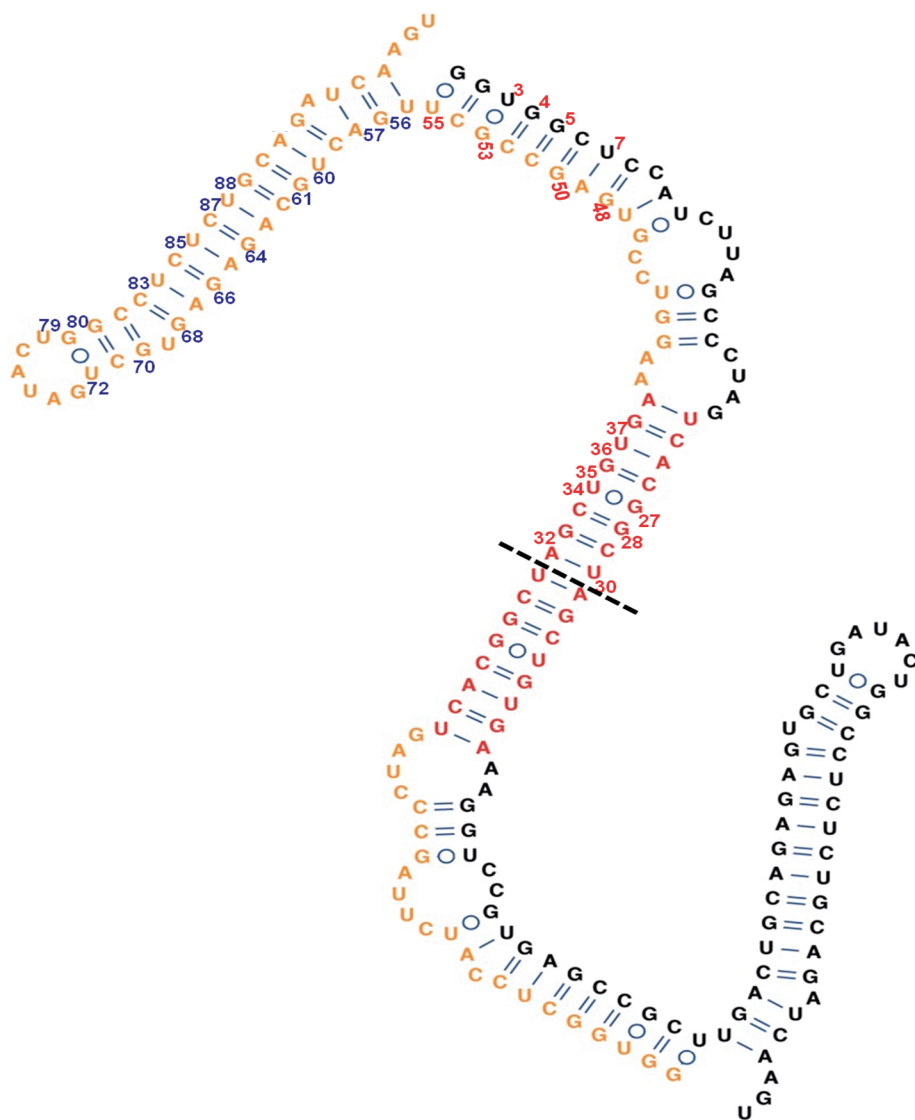

Fig. S6

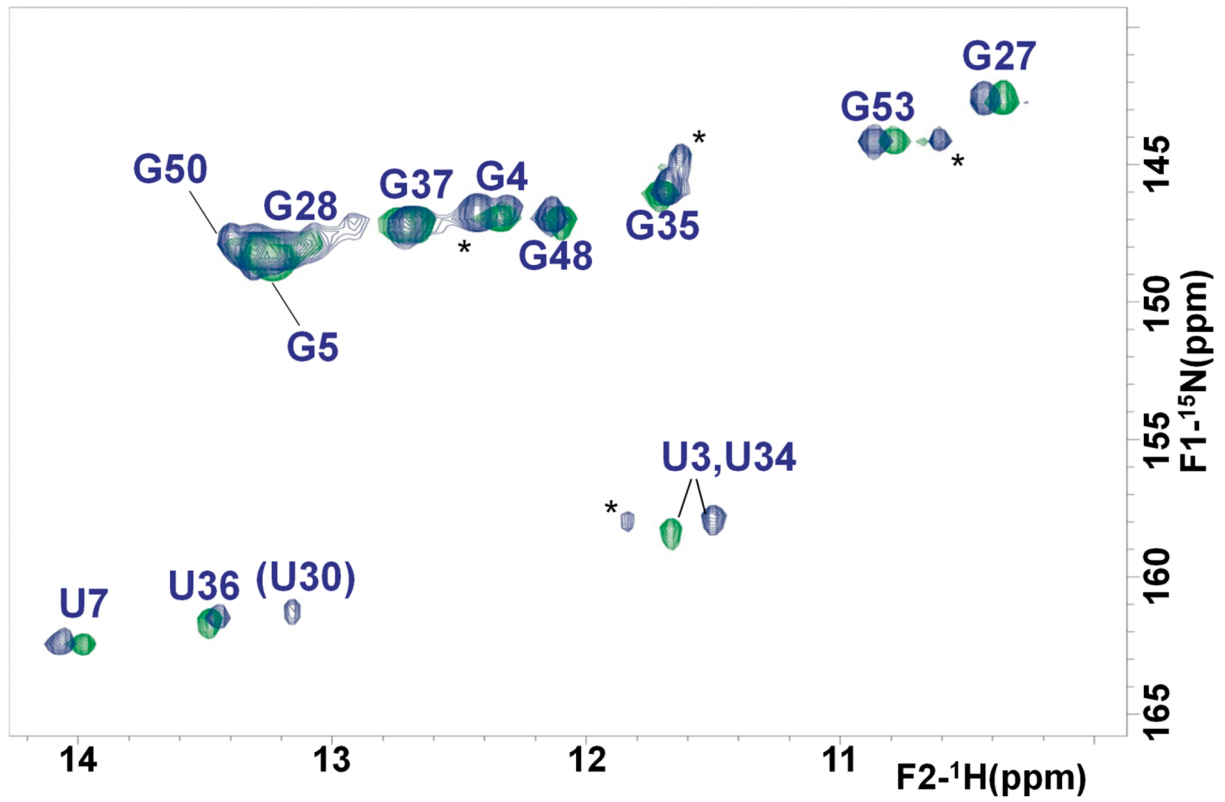

A

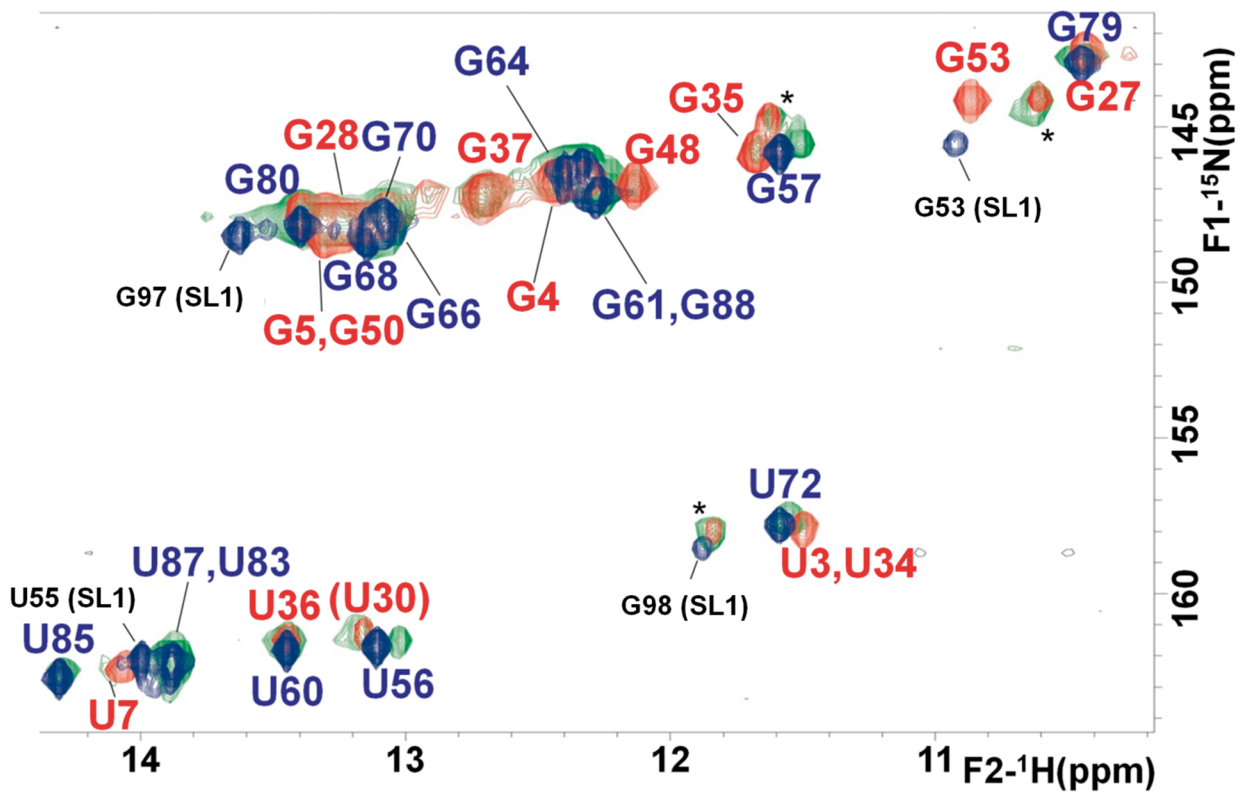

B
